# Supplementary material for: Oxidative Stress Plays an Important Role in Glutamatergic Excitotoxicity-Induced Cochlear Synaptopathy: Implication for Therapeutic Molecules Screening
Source: MDPI journal article supplement (doi:10.3390/antiox13020149), 2024-01-25
Supplement: s1 [file s1]

## Supplementary file

### Supplementary Figure 1

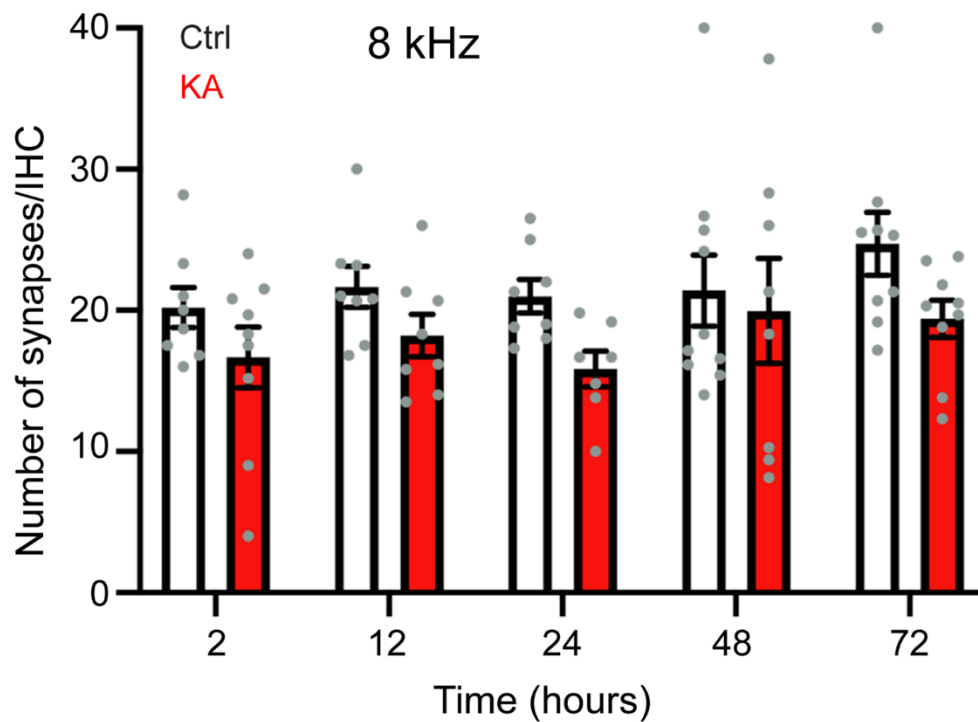

**Figure S1: Kainate did not affect IHC synapse at cochlear apical region**

Counting of the IHC synapses (paired CtBP2-PSD95) over time in cochlear region coding 8 KHz in control condition (black) and KA condition (red). All data are expressed as mean  $\pm$  SEM ( $n = 6-10$  cochleae per condition). One way ANOVA test was followed by Dunn's test.

## Supplementary Figure 2

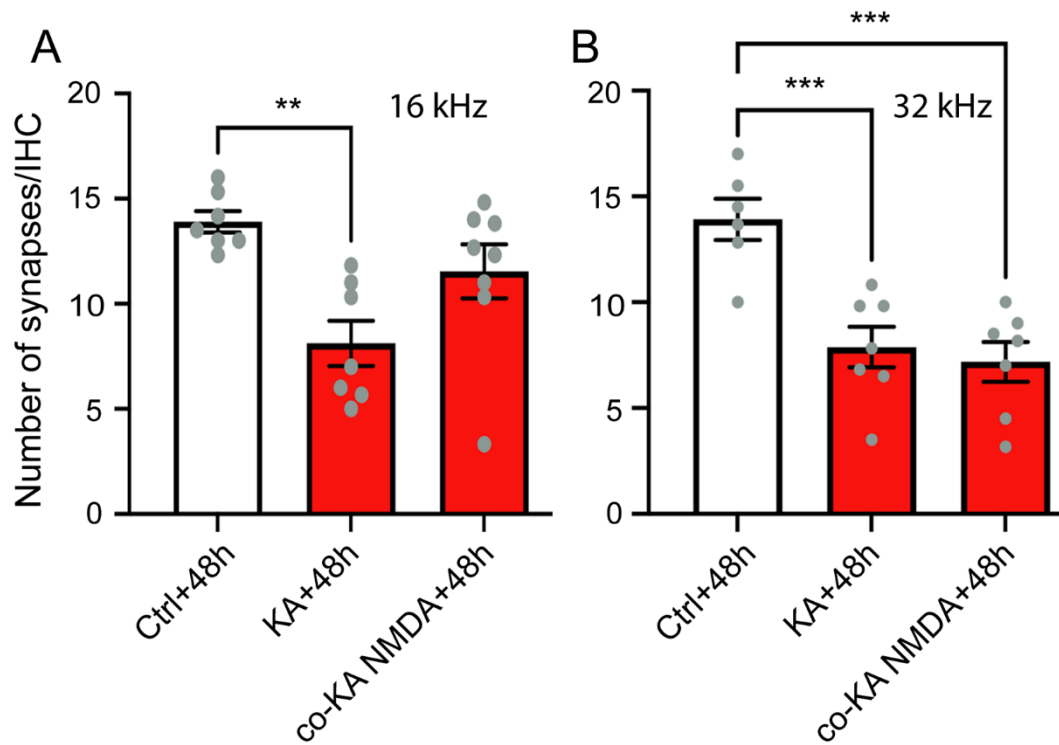

**Figure S2: Addition of NMDA did not modify the effect of kainite on IHC synapses**

**A-B:** Quantification of synapses (paired CtBP2-PSD95) per IHC in cochlear regions coding 16 KHz (**A**) and 32 KHz (**B**) of explants exposed to medium alone for 2 h + 48 h (Ctrl + 48 h), medium containing KA or KA in combination with NMDA at 0.5mM respectively for 2 h then medium alone for 48 h (KA + 48 h) or (co-KA NMDA+48h). All data are expressed as mean  $\pm$  SEM (n = 6-7 cochleae per condition). One way ANOVA test was followed by Dunn's test: \*\* $p \leq 0.01$ , \*\*\* $p \leq 0.001$ .

**Supplementary Table 1**

|                                       | target name                   | Antibody                    | Species    | Isotype | Cat Number                | Company                  | Dilution |
|---------------------------------------|-------------------------------|-----------------------------|------------|---------|---------------------------|--------------------------|----------|
| IF Primary antibodies                 | V-GLUT 3                      | Anti-VGLUT3                 | guinea pig | IgG     | 135204<br>RRID:AB_2619825 | Synaptic Systems         | 1/500    |
|                                       | Neurofilament 200             | Anti-NF200                  | rabitt     | IgG     | N0142<br>RRID:AB_477257   | Sigma-Aldrich            | 1/400    |
|                                       | Cytochrome c oxidase          | Anti-cytochrome c oxidase   | mouse      | IgG     | 556432<br>RRID:AB_396416  | BD Biosciences           | 1/200    |
|                                       | BDNF                          | anti-BDNF                   | rabitt     | IgG     | ab223354                  | Abcam                    | 1/500    |
|                                       | TrkB                          | anti-TrkB                   | rabitt     | IgG     | ab18987<br>RRID:AB_444716 | Abcam                    | 1/500    |
|                                       | CtBP2(ribbon)                 | anti-CtBP2                  | mouse      | IgG1    | 612044<br>RRID:AB_399431  | BD Biosciences           | 1/500    |
|                                       | PSD95(post synapytic density) | anti-PSD95                  | mouse      | IgG2a   | 75-028<br>RRID:AB_2292909 | NeuroMab                 | 1/500    |
| IF Secondary Antibodies & Fluorescent |                               | anti-guinea pig ,Alexa 488  | goat       | IgG     | A-11073 RRID: AB_2534117  | Molecular Probes         | 1/1000   |
|                                       |                               | anti-mouse, Alexa 488       | donkey     | IgG     | A-21202 RRID: AB-141607   | Molecular Probes         | 1/1000   |
|                                       |                               | anti-rabbit,Alexa 594       | donkey     | IgG     | A-21207, RRID:AB_141637   | Molecular Probes         | 1/1000   |
|                                       |                               | anti-mouse IgG1,Alexa 488   | goat       | IgG     | A21121 RRID:AB_2535764    | Molecular Probes         | 1/1000   |
|                                       |                               | anti-mouse IgG2a, Alexa 568 | goat       | IgG     | A21134 RRID:AB_2535773    | Molecular Probes         | 1/1000   |
|                                       |                               | anti-guinea pig, Alexa 647  | goat       | IgG     | A21450 RRID:AB_2535867    | Molecular Probes         | 1/1000   |
|                                       | Hoechst 33342                 |                             |            |         | #62249                    | Thermo Fisher Scientific | 1/5000   |
|                                       | Actin - Alexa 647 phalloidin  |                             |            |         | #A22287                   | Thermo Fisher Scientific | 1/1000   |

**Table S1. Shown are the antibodies used and basic information about these antibodies.**

**Supplementary Table 2**

|                       | Track1         | Track2         | Track3         | Track4         |
|-----------------------|----------------|----------------|----------------|----------------|
|                       | Chanel1        | Chanel2        | Chanel3        | Chanel4        |
| Contrast method       | fluorescence   | fluorescence   | fluorescence   | fluorescence   |
| Pinhole               | 0,99 AU        | 1 AU           | 0,99 AU        | 1 AU           |
| Laser wavelength      | 405nm:0,4%     | 488: 2,40%     | 561nm: 2,40%   | 633nm:1,80%    |
| Scan mode             | Frame          | Frame          | Frame          | Frame          |
| Scan zoom             | 2,2            | 2,2            | 2,2            | 2,2            |
| Pixel time            | 1,02 $\mu$ s   | 1,02 $\mu$ s   | 1,02 $\mu$ s   | 1,02 $\mu$ s   |
| Line time             | 0,24 $\mu$ s   | 0,24 $\mu$ s   | 0,24 $\mu$ s   | 0,24 $\mu$ s   |
| Frame time            | 2,90 s         | 2,90 s         | 2,90 s         | 2,90 s         |
| Scan direction        | unidirectional | unidirectional | unidirectional | unidirectional |
| Averaging             | 2              | 2              | 2              | 2              |
| Speed                 | 7              | 7              | 7              | 7              |
| Chanel name           | Ch2GaAsP-T1    | Ch2GaAsP-T2    | Ch2GaAsP-T3    | Ch2GaAsP-T3    |
| Chanel color          | Blue           | Green          | Red            | Magenta        |
| Excitation wavelength | 405            | 488            | 561            | 633            |
| Emission wavelength   | 453            | 519            | 600            | 707            |
| Effective NA          | 1,4            | 1,4            | 1,4            | 1,4            |
| Detection wavelength  | 415-490        | 498-541        | 570-630        | 660-754        |
| Detector gain         | 500            | 500            | 500            | 540            |
| Detector offset       | 0              | 0              | 0              | 0              |
| Detector digital gain | 1              | 1              | 1              | 1              |

**Table S2. Shown are the parameters used for confocal image acquisitions.**
